# Supplementary material
Source: publisher site journal article supplement (http://www.kjim.org/upload/media/kjim-2019-016-suppl1.pdf)
Supplement: Supplementary file 1 [file kjim-2019-016-suppl1.pdf]

**Supplementary Table 1. EMBASE search strategy**

| No. | Search query                                                                                                                                                                                                                                    | Results   |
|-----|-------------------------------------------------------------------------------------------------------------------------------------------------------------------------------------------------------------------------------------------------|-----------|
| #1  | 'alcoholic cardiomyopathy'/exp                                                                                                                                                                                                                  | 944       |
| #2  | 'cardiovascular disease'/exp OR cardiovascular NEAR/3 disease*                                                                                                                                                                                  | 3,602,305 |
| #3  | myocardial NEAR/3 infarction* OR 'heart attack' OR 'heart attacks'                                                                                                                                                                              | 239,452   |
| #4  | 'hypertension'/exp OR hypertens* OR high NEAR/3 'blood pressure'                                                                                                                                                                                | 837,999   |
| #5  | 'atrial fibrillation'/exp OR (atrial OR auricular) NEAR/3 fibrillation*                                                                                                                                                                         | 117,233   |
| #6  | 'variant angina pectoris'/exp OR vasospastic NEAR/3 angina                                                                                                                                                                                      | 7,973     |
| #7  | (ischemic OR ischemia* OR infarction*) NEAR/3 (myocardial OR heart OR cardiac OR cardio-vasc*)                                                                                                                                                  | 521,299   |
| #8  | coronary NEAR/3 ('artery disease' OR 'artery diseases' OR atheroscleros* OR 'heart disease' OR 'heart diseases')                                                                                                                                | 275,578   |
| #9  | (heart OR cardiac OR myocardial) NEAR/3 failure*                                                                                                                                                                                                | 334,296   |
| #10 | 'cerebrovascular accident'/exp OR stroke OR strokes                                                                                                                                                                                             | 391,261   |
| #11 | (cerebrovascular OR 'brain vascular' OR cerebrovascular) NEAR/3 (accident* OR infarction*)                                                                                                                                                      | 254,471   |
| #12 | 'brain hemorrhage'/exp OR (brain OR intracranial) NEAR/3 hemorrhage*                                                                                                                                                                            | 111,601   |
| #13 | #2 OR #3 OR #4 OR #5 OR #6 OR #7 OR #8 OR #9 OR #10 OR #11 OR #12                                                                                                                                                                               | 3,780,448 |
| #14 | 'drinking behavior'/exp OR 'binge drinking'/exp OR 'alcohol intoxication'/exp OR 'alcoholism'/exp OR 'alcoholic beverage'/exp                                                                                                                   | 172,293   |
| #15 | alcohol* NEAR/3 (consumption* OR intak* OR drinking* OR beverag* OR exposur* OR abstinenc* OR ethyl OR pattern* OR heavy OR harmful OR binge* OR light OR mederate OR excess* OR hazard* OR problem* OR abuse* OR use OR related OR influence*) | 205,828   |
| #16 | (drink* OR drunk*) NEAR/3 (pattern* OR heavy OR harmful OR binge* OR light OR mederate OR excess* OR hazard* OR problem* OR abuse* OR use OR related OR influence*)                                                                             | 29,747    |
| #17 | alcoholic OR ethanol                                                                                                                                                                                                                            | 193,925   |
| #18 | #14 OR #15 OR #16 OR #17                                                                                                                                                                                                                        | 435,852   |
| #19 | #13 AND #18                                                                                                                                                                                                                                     | 55,437    |
| #20 | #1 OR #19                                                                                                                                                                                                                                       | 55,437    |
| #21 | 'incidence'/exp OR incidenc*                                                                                                                                                                                                                    | 941,098   |
| #22 | 'mortality'/exp OR mortalit* OR 'death rate' OR 'death rates'                                                                                                                                                                                   | 1,109,574 |
| #23 | 'adverse drug reaction'/exp OR 'adverse effect' OR 'adverse effects' OR 'side effect' OR 'side effects'                                                                                                                                         | 1,286,371 |
| #24 | 'dose response'/exp OR 'dose-response' OR 'dose response'                                                                                                                                                                                       | 415,526   |
| #25 | #21 OR #22 OR #23 OR #24                                                                                                                                                                                                                        | 3,323,934 |
| #26 | #20 AND #25                                                                                                                                                                                                                                     | 18,272    |
| #27 | #26 NOT ([systematic review]/lim OR 'review'/exp OR [meta analysis]/lim OR 'systematic review'/exp OR 'systematic review (topic)'/exp OR 'meta analysis'/exp OR 'meta analysis' OR 'meta                                                        | 14,328    |
